# Supplementary material
Source: MDPI journal article supplement (https://www.mdpi.com/2073-4344/13/6/1002)
Supplement: s1 [file s1]

# An Efficient and Mild Method for the Alkylation of p-Cresol with tert-Butyl Alcohol

Qi Wu <sup>1</sup>, Dejin Zhang <sup>1,2,\*</sup>, Shu Sun <sup>3</sup>, Chengcheng Liu <sup>1</sup> and Cong Wang <sup>1</sup>

<sup>1</sup> School of Chemistry and Chemical Engineering, Suzhou University, Suzhou 234000, China

<sup>2</sup> International Innovation Center for Forest Chemicals and Materials, Nanjing Forestry University, Nanjing 210037, China

<sup>3</sup> School of Biology and Food Engineering, Suzhou University, Suzhou 234000, China

\* Correspondence: szxyzdj@163.com

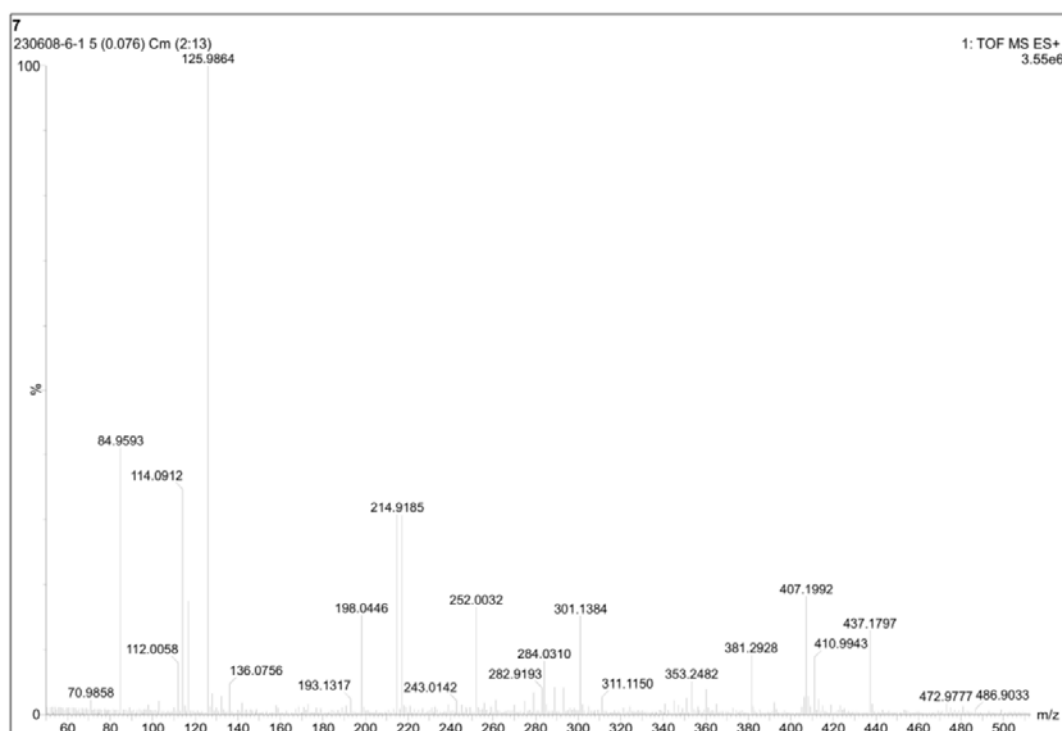

Figure S1. HR-MS of CAL-TsOH (m/z=50-500)

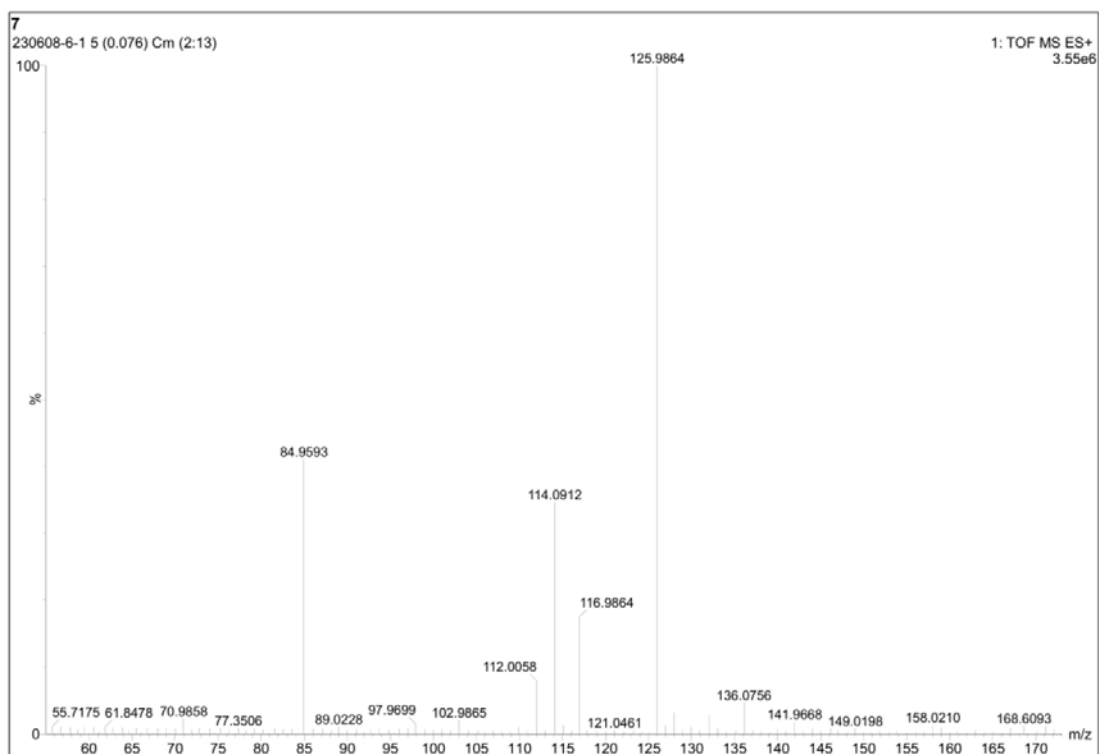

Figure S2. HR-MS of CAL-TsOH ( $m/z=50-180$ )

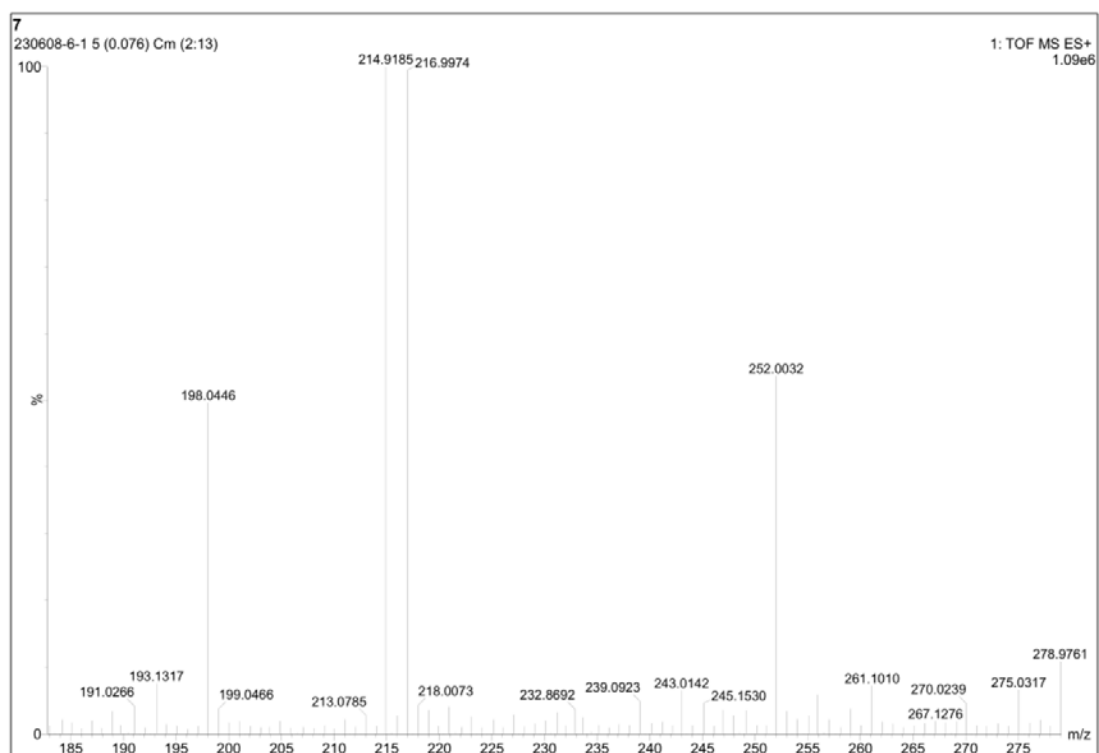

Figure S3. HR-MS of CAL-TsOH ( $m/z=180-280$ )

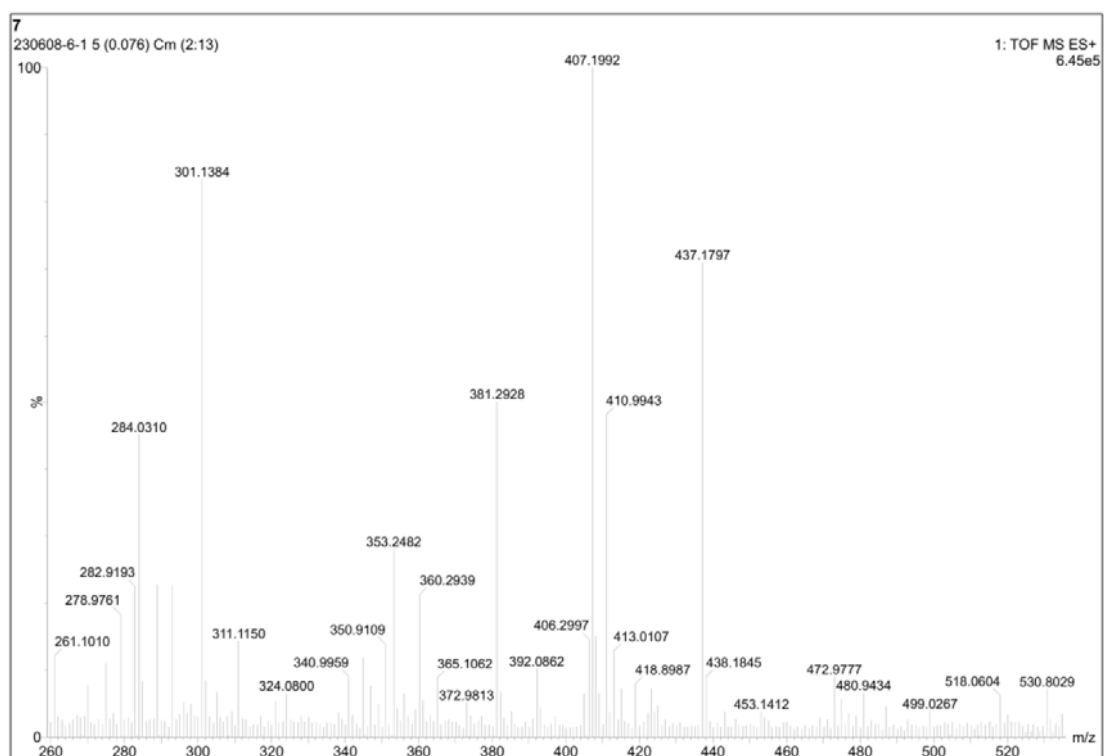

Figure S4. HR-MS of CAL-TsOH ( $m/z$ =260-500)

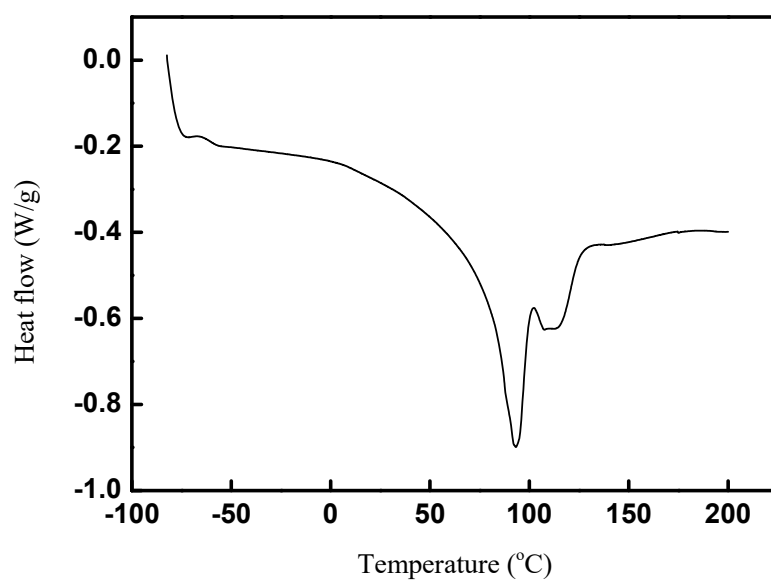

Figure S5. DSC curve of CAL-TsOH
